# Supplementary material for: Generation of mouse conditional knockout alleles in one step using the i-GONAD method
Source: PubMed Central journal article supplement — Genome Res. 2021 Jan;31(1):121–30. doi: 10.1101/gr.265439.120 (PMC7849380; doi:10.1101/gr.265439.120), 2021-01
Supplement: supp_gr.265439.120_Supplemental_Materials.pdf [file supp_gr.265439.120_Supplemental_Materials.pdf]

## Supplemental Materials

### Generation of mouse conditional knockout alleles in one step using the *i*-GONAD method

Renjie Shang<sup>1,2</sup>, Haifeng Zhang<sup>1</sup>, Pengpeng Bi<sup>1,2,\*</sup>

<sup>1</sup>Center for Molecular Medicine, University of Georgia, Athens, GA 30602, USA

<sup>2</sup>Department of Genetics, University of Georgia, Athens, GA 30602, USA

\*Correspondence: [pbi@uga.edu](mailto:pbi@uga.edu)

Corresponding Author: Pengpeng Bi

Email: [pbi@uga.edu](mailto:pbi@uga.edu)

Telephone: (706) 542-7768

**This PDF file includes:**

Materials and Methods

Supplemental Figs S1–S11

## Materials and Methods

### gRNA and ssODNA sequences

*Fosl1* 5' gRNA: CCGGACGCTTGTCATCTCAT.

*Fosl1* 3' gRNA: AGAGGGTCGCCCCATTCTTC.

*Fosl1* 5' ssODNA:

AGGAAGATCAAAGTTTACAGAGAGGGAAAGCATTTCAGGAAAGAAACCAGCAGTAAAGCT  
AGGTGTGTGTGAGCTGGAAATGTCACCAATGATAACTTCGTATAGCATAACATTATACGAAGT  
TATAGATGACAAGCGTCCGGTACAGAGAAGCAACTGTGG.

*Fosl1* 3' ssODNA:

ACCATTTGGAACAGGAGTTCCAGGTTCCAGTCTCAGCATTGACCTTGAAGAACTACCATAT  
GTTTTTGGACTTCCATATTCTCACCTGAAATAACTTCGTATAGCATAACATTATACGAAGTTAT  
GAATGGGGCGACCCTCTGCTCTTCCTTGTCTCCTAT.

*Plagl1* 5' gRNA: GATTGCAGGCTTGAATACGG.

*Plagl1* 3' gRNA: ATGGAACCATCTATGAGACC.

*Plagl1* 5' ssODNA:

CTGGGTATCTGCAGAGAGAAGAGGAACAGATTTCTCACATCAGCTATTGGAAAACCTGTATCC  
CCCCACCAGCACCAGCATCAGCACCACCGATAACTTCGTATAATGTATGCTATACGAAGTTA  
TTATTCAAGCCTGCAATCAGTATATTCTTTTAAGAGG.

*Plagl1* 3' ssODNA:

ATCTCAGAGCAGTGAATTTGATCCCGTGAGGCTATCTTGCTGCTTCATTGTCTACTCTAGGTC  
AGGTCAACTGTGTCTTATGGGCCCTGGTATAACTTCGTATAATGTATGCTATACGAAGTTATC  
TCATAGATGGTTCCATAGTGCAAGGTTTCCCCATT.

*Ak040954* 5' gRNA: ACCCTTATAAAATAACCTCG.

*Ak040954* 3' gRNA: GTATCTGGCGATGTGTTTAG.

*Ak040954* 5' ssODNA:

CAAACCTTTGCCTGCTGGGTCCCCAGCAAGCCTTACAGTCCTGATGTCTGCTCTAACACATTT  
GCACTCCACCTCTGGTTCCACACCTCTAATAACTTCGTATAGCATAACATTATACGAAGTTATA  
ACACATCGCCAGATACCCAAAGTCATCAGTGAACA.

*Ak040954* 3' ssODNA:

TGTTTTTCTTTATGCATCTCAAAGGATCCTGTACTGCTTTCAAAGGAACCACTGCACCACACG  
GTTCCCTGTCTTCTGTCTTTCTCCACGAATAACTTCGTATAATGTATGCTATACGAAGTTATG  
GTTATTTTATAAGGGTAAAGCTCAGGTCTTACTTA.

*Clefl* 5' gRNA: GTCAGCACGTCCCACCCGAG.

*Clefl* 3' gRNA: GTACACAGGCCTTGGAGTAC.

*Clefl* 5' ssODNA:

ATCATTTGCATGGAGGAGACAGGTGAAGCAGTGGGGTGATGAGTTCTCCTATGGAGAAGTG  
CAGAGAGAGAAAACCACGAAGGAGCCACTCATAACTTCGTATAATGTATGCTATACGAAGT  
TATGGGTGGGACGTGCTGACTGTCTGGGTGGAGAATGCC.

*Clefl* 3' ssODNA:

AAACACACACAGCTATCTGGGAGGACCAAGGCATAGTGGGTGTGGCAAGGGAGTGGATGGG  
TTGCTCCAGGGCCAGCAGTAAGAGCCTGTAATAACTTCGTATAATGTATGCTATACGAAGTT  
ATCTCCAAGGCCTGTGTACCTCTATGGTATAAAGAGAC.

*Gm44386* 5' gRNA: CACCCTCAAACCTTGATACAT.

*Gm44386* 3' gRNA: GACCACAATGCAATTTACAT.

*Gm44386* 5' ssODNA:

TCAAAGCAATTACTATATTAATTATTACTATATTATCACCAAAGGGGTCAGGACCCAAAGGT  
 TGAGAACCCCTGTTCTGGGTCCTCCTATGATAACTTCGTATAATGTATGCTATACGAAGTTAT  
 TATCAAGTTTGAGGGTGGCTTGGGCTACATGAGACT.

*Gm44386* 3' ssODNA:

CATCATGAGTTCCAAGCCAGCCTGGACAGAAGGAGCCCCTGTTAGAGATGTAGAGCCATGC  
 AAGCATGAAGACCTGAGTTTATAACCCATGATAACTTCGTATAGCATAATTATACGAAGTT  
 ATTAATTGCATTGTGGTCAGGCAGTGGTGGCACATGC.

### Mouse genotyping primer sequences

| Gene                        | Primer name                     |                     | Sequence (5'–3')                      | Expected amplicon size                           |
|-----------------------------|---------------------------------|---------------------|---------------------------------------|--------------------------------------------------|
| <i>Fosl1</i>                | 5' <i>loxP</i>                  | Forward             | TCCACAGATGAGGAGGCTGA                  | WT 392 bp, <i>loxP</i> 426 bp                    |
|                             |                                 | Reverse             | TGGGCTGATCTAGGTTGGGA                  |                                                  |
|                             | 3' <i>loxP</i>                  | Forward             | AGAAGCGCTTAGCTTCAGGG                  | WT 317 bp, <i>loxP</i> 351 bp                    |
|                             |                                 | Reverse             | TGCTTGCCTCCAGAGCATT                   |                                                  |
|                             | Long-range PCR                  |                     | 5' <i>loxP</i> -F + 3' <i>loxP</i> -R |                                                  |
| <i>Plagl1</i>               | 5' <i>loxP</i>                  | Forward             | AGAAAGGGAGGATGGGTTGC                  | WT 278 bp, <i>loxP</i> 312 bp                    |
|                             |                                 | Reverse             | TGAGGAAGTCTGTGCCATT                   |                                                  |
|                             | 3' <i>loxP</i>                  | Forward             | GGGTTGAAGCCAGTGACAGT                  | WT 200 bp, <i>loxP</i> 234 bp                    |
|                             |                                 | Reverse             | TTTGGGGAGACTGCCTTTCC                  |                                                  |
|                             | Long-range PCR-F                |                     | GCAACTAGACTCCATGTCCCC                 |                                                  |
| Long-range PCR-R            |                                 | AGTTGTGCTTGGTGTGAGT |                                       |                                                  |
| <i>Ak040954</i>             | 5' <i>loxP</i>                  | Forward             | CTCCCTCTCCCTGACCAGA                   | WT 327 bp, <i>loxP</i> 361 bp                    |
|                             |                                 | Reverse             | TTGCCCTCCACTGATTGTCC                  |                                                  |
|                             | 3' <i>loxP</i>                  | Forward             | GGCCACAGTTCTGCTGGTAT                  | WT 357 bp, <i>loxP</i> 391 bp                    |
|                             |                                 | Reverse             | CAGGCCTCTCTTTGCTCTGG                  |                                                  |
|                             | Long-range PCR                  |                     | 5' <i>loxP</i> -F + 3' <i>loxP</i> -R |                                                  |
| <i>Clcf1</i>                | 5' <i>loxP</i>                  | Forward             | CTACCTCTCCAGCCTGGTCT                  | WT 355 bp, <i>loxP</i> 389 bp                    |
|                             |                                 | Reverse             | AGTCAGGCTCGTTGAAAGGG                  |                                                  |
|                             | 3' <i>loxP</i>                  | Forward             | ACCCTAACCCCTACCTGCCAT                 | WT 188 bp, <i>loxP</i> 222 bp                    |
|                             |                                 | Reverse             | CCAGAGGCAAGGAAGACTGG                  |                                                  |
|                             | Long-range PCR                  |                     | 5' <i>loxP</i> -F + 3' <i>loxP</i> -R |                                                  |
| <i>Gm44386</i>              | 5' <i>loxP</i>                  | Forward             | GGAACAGGCTGTCACAGGAG                  | WT 397 bp, <i>loxP</i> 431 bp                    |
|                             |                                 | Reverse             | GAAGCTGGAGATCAGAAGGCA                 |                                                  |
|                             | 3' <i>loxP</i>                  | Forward             | AGGAGCCCCTGTTAGAGATGT                 | WT 381 bp, <i>loxP</i> 415 bp                    |
|                             |                                 | Reverse             | GTGTGGGGATATGCTGICTGA                 |                                                  |
|                             | Long-range PCR                  |                     | 5' <i>loxP</i> -F + 3' <i>loxP</i> -R |                                                  |
| <i>Mecp2</i>                | 5' <i>loxP</i>                  | Forward             | CCCAGCTTGACCCAAGGATA                  | WT 287 bp, <i>loxP</i> 327 bp                    |
|                             |                                 | Reverse             | GGCTGAAGGTTGTAGTGGCT                  |                                                  |
|                             | 3' <i>loxP</i>                  | Forward             | AGGTGGGTAGGAAGGCTAGG                  | WT 218 bp, <i>loxP</i> 258 bp                    |
|                             |                                 | Reverse             | CTCCTCTGTACTCCCTGGCT                  |                                                  |
|                             | Long-range PCR                  |                     | 5' <i>loxP</i> -F + 3' <i>loxP</i> -R |                                                  |
| <i>Pax7<sup>CreER</sup></i> | 10221- <i>Pax7<sup>CE</sup></i> |                     | ACTAGGCTCCACTCTGTCCCTTC               | WT 724 bp,<br><i>Pax7<sup>CreER</sup></i> 231 bp |
|                             | 10222- <i>Pax7<sup>CE</sup></i> |                     | GCAGATGTAGGGACATTCCAGTG               |                                                  |

Genotyping primers were designed to detect indels in predicted off-targeting sites. The primer sequences are listed in the table below.

| Target gene     | Off-target of gRNA | Sequence (5'–3')          | WT size (bp) |
|-----------------|--------------------|---------------------------|--------------|
| <i>Fos11</i>    | #1                 | CGCTCACTTGGAGAAATGCC      | 370          |
|                 |                    | TGACAACATAGAAGTGTGTAGGTTT |              |
| <i>Fos11</i>    | #2                 | CCAGCCTGTTTCTTTCCCA       | 270          |
|                 |                    | GGTCATCTTCTGCCCTGAC       |              |
| <i>Plagl1</i>   | #3                 | AGCCCCATACAAACATCGGG      | 388          |
|                 |                    | ACCTTGCACTCTGTCTACGC      |              |
| <i>Plagl1</i>   | #4                 | ACAGAATGCATCAAGTGCTATG    | 369          |
|                 |                    | GTTCTCAGATGCTGTGCCT       |              |
| <i>Ak040954</i> | #5                 | ACAGAGAGCTCAGGCATTGG      | 117          |
|                 |                    | TCACCGAGGTAACCTTGCCC      |              |
| <i>Ak040954</i> | #6                 | CTACCCTGTGTCCCAAGCTG      | 206          |
|                 |                    | GCTTGAGTCCAAGACCAGCA      |              |
| <i>Clcf1</i>    | #7                 | TGGGAAGTTAAGTTCGCGGG      | 293          |
|                 |                    | TACAGACCTCCGAACGTCCA      |              |
| <i>Clcf1</i>    | #8                 | TGGGGTACATTGCTGGTCAC      | 249          |
|                 |                    | AGCAAATGCAGGCTGAGCTA      |              |
| <i>Gm44386</i>  | #9                 | ACACTATGGGGCACTGAAGC      | 282          |
|                 |                    | ATGCTAATGCCTGTCGTGCT      |              |
| <i>Gm44386</i>  | #10                | CATTGGCACCCCTGTTGGTG      | 108          |
|                 |                    | GCTTACAGATGTAGCACTGGC     |              |

### Cell cultures and transfection

10T1/2 fibroblasts were maintained in 10% FBS with 1% penicillin/streptomycin in DMEM. Lentiviruses expressing Cas9 and gRNA were packed by co-transfections of pLenti-V2 (a gift from Feng Zhang, Addgene, 1000000052) with psPAX2 and pMD2.G plasmids into Lenti-X 293T cells (Takara Bio, 632180). Two days after infection, genomic DNA was extracted for genotyping. Primary myoblasts were isolated from adult muscle tissues by enzymatic digestions as previously described (Bi et al. 2016). Pre-plating was performed to enrich myoblast and separate fibroblasts. To activate CreER, 2  $\mu$ M 4-hydroxytamoxifen (Cayman Chemical, 14854) was added to cell culture for 48 hrs before collecting RNA for gene expression analysis.

### Quantitative real-time PCR (qPCR)

Total RNA was extracted from mouse tissue or cells with TRIzol (Invitrogen). cDNA was synthesized using iScript™ Reverse Transcription Supermix (Bio-Rad, 1708841). Gene expression was assessed using standard qPCR approaches with KAPA SYBR FAST qPCR Master Mix (KK4605). Analysis was performed on a QuantStudio 3 PCR System (Thermo Fisher Scientific) with the following primers:

*Fos11*-F1: 5'- ATGTACCGAGACTACGGGGAA -3' (in exon1),

*Fos11*-R1: 5'- CTGCTGCTGTTCGATGCTTG -3' (in exon2).

This pair of primers was used to generate Supplemental Fig. S1A.

*Fos11*-F2: 5'- CCAGGACCCGTACTTGAACC-3' (in exon4),

*Fos11*-R2: 5'- AGGAGTGTAGGAGAGCCCAG-3' (in exon4).

This pair of primers was used to generate Fig. 6D.

*I8s*-F: 5'- ACCGCAGCTAGGAATAATGGA -3',

*18s*-R: 5'- GCCTCAGTTCCGAAAACCA -3'.

The  $2^{\Delta\Delta Ct}$  method was used to analyze the relative changes in gene expression normalized against *18s* rRNA expression.

### **Western blotting analysis**

Protein was isolated from tissues using RIPA buffer (Sigma-Aldrich, R0278). Protein concentrations were determined using BCA Protein Assay Reagent (Thermo Fisher Scientific, 23225), followed by measurement with NanoDrop. Protein samples were mixed with 4X Laemmli sample buffer (Bio-Rad, 161-0747) and 20-40  $\mu$ g protein was loaded and separated by SDS-PAGE gel electrophoresis. The proteins were transferred to a polyvinylidene fluoride (PVDF) membrane (Millipore), blocked in 5% fat-free milk for 1 hour at room temperature, and then incubated with the following primary antibodies diluted in 5% milk overnight at 4°C: Gapdh (Thermo Fisher Scientific, MA5-15738), Myomaker (customized, mouse monoclonal), Fos11 (Santa Cruz Biotechnology, sc-28310). The HRP-conjugated secondary antibodies: Donkey anti-sheep IgG-HRP (Santa Cruz Biotechnology, sc-2473), Goat Anti-Mouse IgG (H+L)-HRP Conjugate (Bio-Rad, 170-6516) and Goat Anti-Rabbit IgG (H + L)-HRP Conjugate (Bio-Rad, 170-6515) were diluted at 1:5,000. Immunodetection was performed using Western Blotting Luminol Reagent (Santa Cruz Biotechnology, sc2048).

### **Requests for materials**

Materials include mouse mutants generated in this study can be requested by contacting the corresponding author.

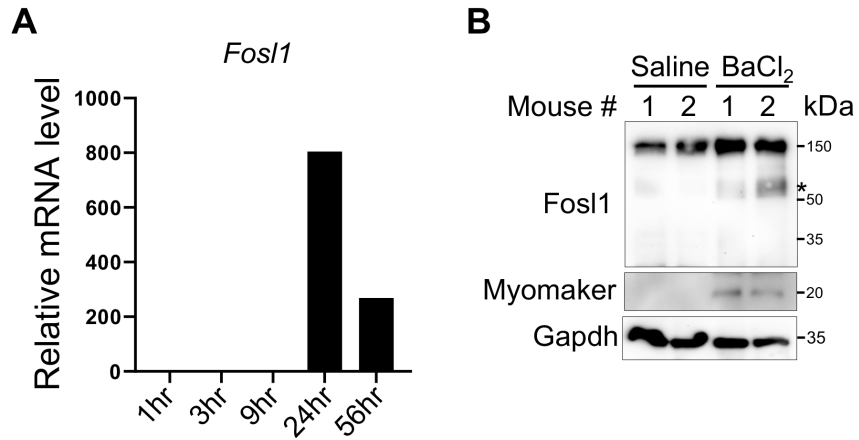

**Supplemental Fig. S1. Induction of *Fos1* expression in muscle tissue following BaCl<sub>2</sub> induced injury.** (A) qPCR measurements of *Fos1* mRNA levels at different hours (hr) following muscle injury. (B) Western blotting results of muscle tissues at 48 hrs post injury, \* highlights the specific band. Myomaker blot serves as a positive control of injury response.

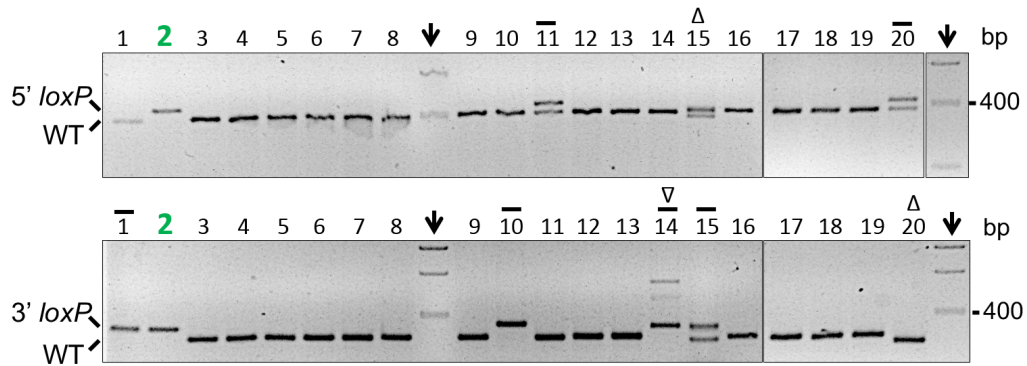

**Supplemental Fig. S2. *Fos/1* genotyping results of the *F0* generation.**

Detection of 5'–*loxP* (top row) and 3'–*loxP* (bottom row) insertions using primer pairs 1F&1R and 2F&2R shown in Fig. 1B. 5'– and 3'–*loxP* band sizes are 426 bp and 351 bp, respectively. #2 founder mouse that showed simultaneous 5'– and 3'–*loxP* insertions is highlighted in green; arrow, DNA marker lane; mouse with single *loxP* integration is indicated with a bar on top of ID; Δ, deletions; ∇, large insertions.

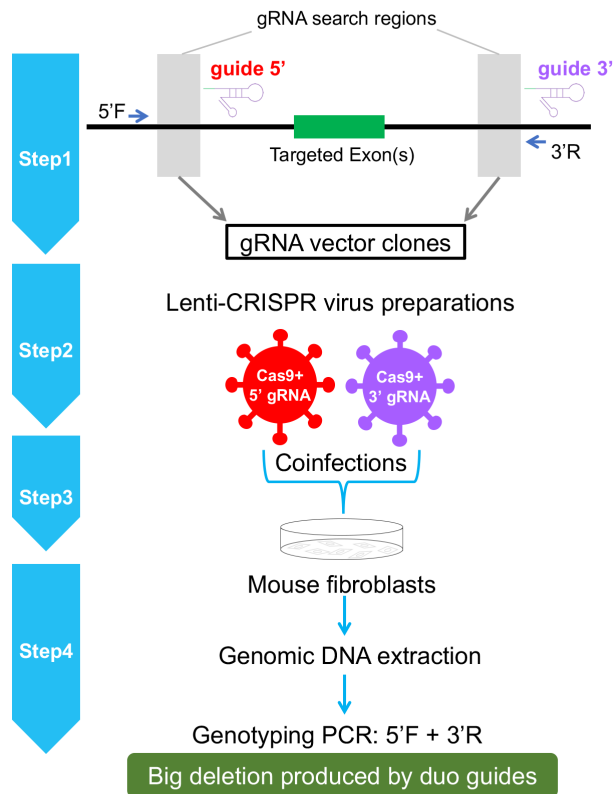

**Supplemental Fig. S3. A workflow to test gRNA editing efficiency in mouse fibroblasts.** Candidate gRNAs with high on-target scores and low risk of off-targeting were cloned into lenti-CRISPR vectors. Efficiency of each gRNA pair (one gRNA from each intron) was tested in fibroblasts. Two days after infections, genotyping PCR was performed with primers 5'F + 3'R. The gRNA pair that can efficiently generate large truncations were chosen for *in vivo* *i*-GONAD experiments for *loxP* insertions.



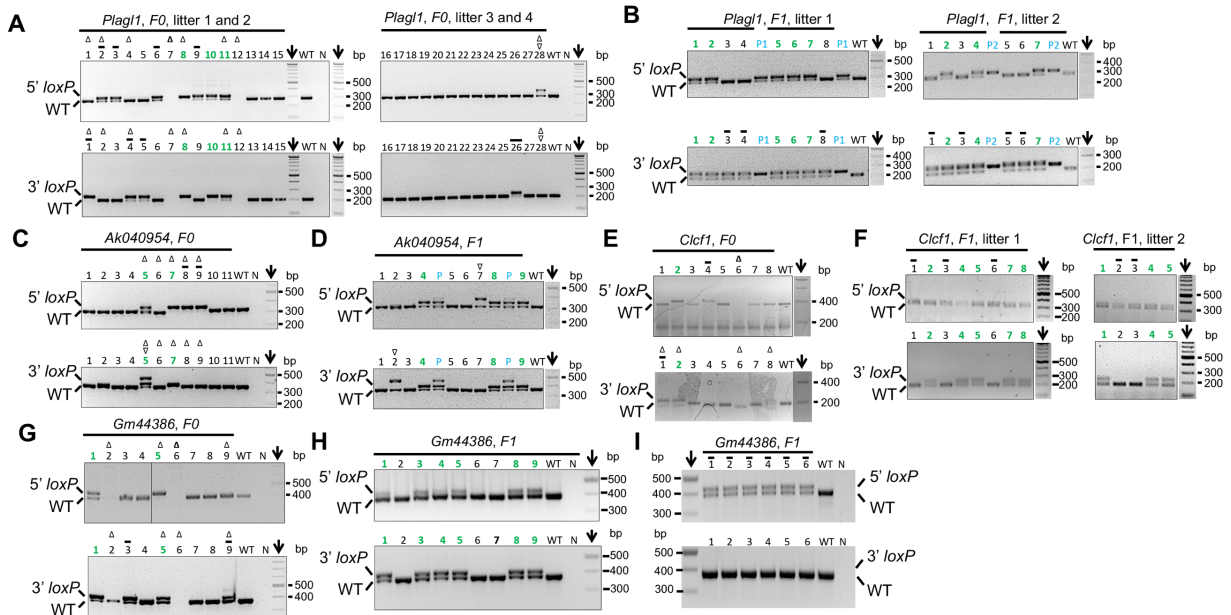

### Supplemental Fig. S4. Genotyping results of F0 and F1 generations.

(A) *Plagl1* genotyping results of F0 generation. The 5'– and 3'–*loxP* band sizes are 312 bp and 234 bp, respectively. (B) *Plagl1* genotyping results of F1 generation from breeding of #10 mouse in A. P1: positive control (founder mouse #10); P2: positive control (founder mouse #8). (C) *Ak040954* genotyping results of F0 generation. 5'– and 3'–*loxP* band sizes are 361 bp and 391 bp, respectively. (D) *Ak040954* genotyping results of F1 generation from breeding of #5 founder mouse in C. P: positive control (founder mouse #5). (E) *Clcf1* genotyping result of F0 generation. 5'– and 3'–*loxP* bands are 389 bp and 222 bp, respectively. (F) *Clcf1* genotyping results of F1 generation from breeding of #2 founder mouse in E. (G) *Gm44386* genotyping results for F0 generation. 5'– and 3'–*loxP* bands are 431 bp and 415 bp, respectively. (H,I) *Gm44386* genotyping results for F1 generation from breeding of #1 founder (H) and #5 founder (I). For all panels, N: negative control (water); green ID highlight mice that showed simultaneous 5'– and 3'–*loxP* insertions; arrow, DNA marker lane; mouse with single-side *loxP* is indicated with a bar on top of ID; Δ, deletions; ∇, big insertions.

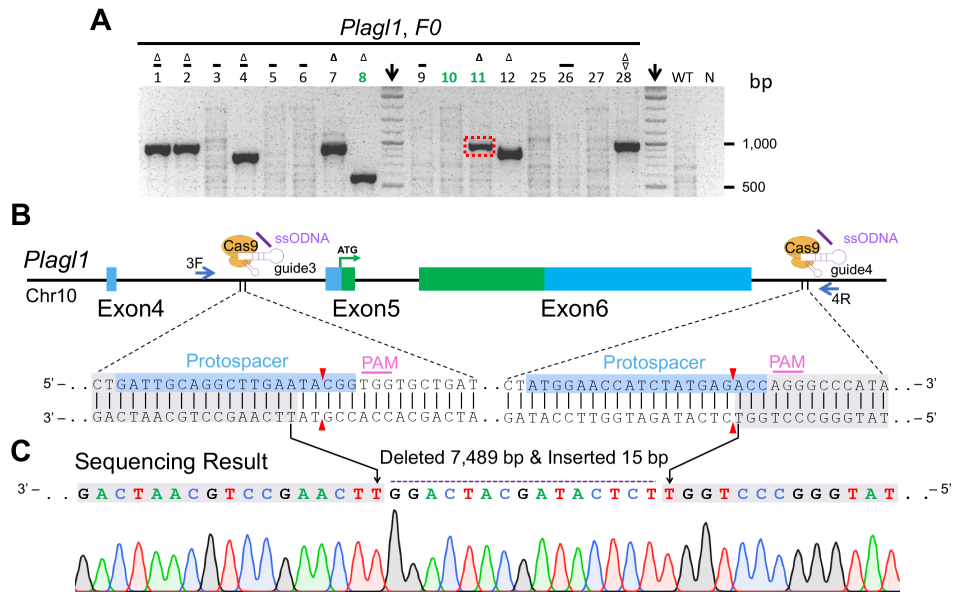

**Supplemental Fig. S5. Deletions of exons 5 and 6 of *Plagl1* gene using *i*-GONAD method.**

(A) *Plagl1* genotyping of *F0* generation using primers shown in B. Note that WT and floxed alleles are too large thus not detected in current PCR condition. Mice #1, #2, #4, #7, #8, #11, #12, #28 showed specific bands of large deletions. WT: wild-type; N: negative control (water); green ID highlight founders that showed simultaneous 5'– and 3'–*loxP* insertions; arrow, DNA marker lane; mouse with single-side *loxP* integration is indicated with a bar on top of ID; Δ, deletions; ▽, large insertions. (B) *Plagl1* gene structure. (C) Sanger sequencing result for the null allele shown in A (red box).

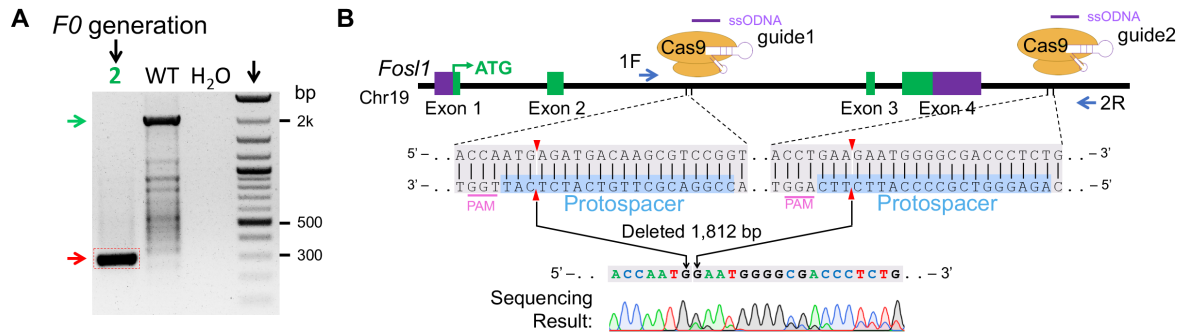

**Supplemental Fig. S6. Deletions of exons 3 and 4 of *Fosl1* gene by *i*-GONAD method.**

(A) *Fosl1* genotyping of *F0* generation using primers shown in B. WT allele is 2,115 bp (green arrow). Note the absence of the WT and *loxP* bands for #2 sample could be caused by biased amplification of the smaller truncated allele (red arrow). (B) *Fosl1* gene structure. Sanger sequencing result for the null allele shown in A (red box).

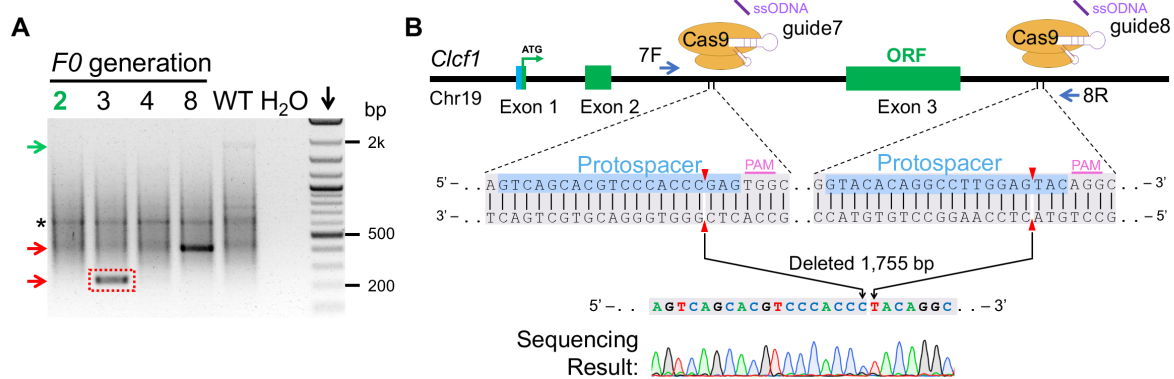

**Supplemental Fig. S7. Deletion of exon 3 of *Clcf1* gene using the *i*-GONAD method.**

(A) *Clcf1* genotyping of *F0* generation using primers shown in B. WT band should be 1,977 bp (green arrow). Red arrows point to the PCR amplifications of null alleles. Note that current PCR condition is not suitable to detect large-sized WT or floxed alleles. (B) *Clcf1* gene structure. Sanger sequencing results for the null allele shown in A (red box).



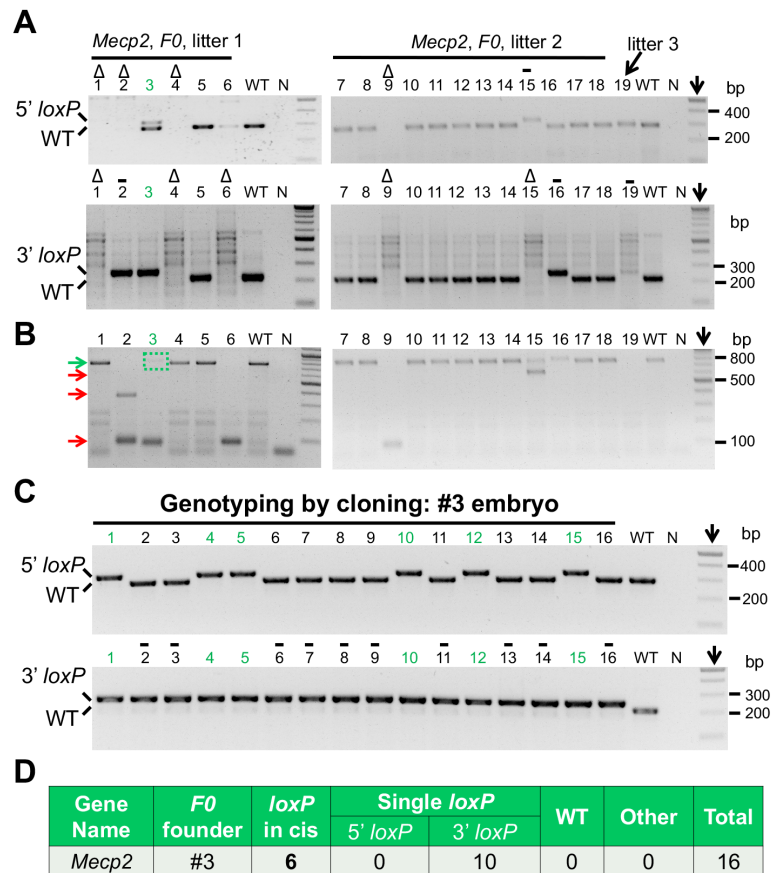

**Supplemental Fig. S9. Test of *i*-GONAD on *Mesp2* gene by using symmetric ssODNAs.**  
 (A) *Mesp2* genotyping results of E12.5 mouse embryos. Top panels: 5' gRNA region (WT band is 287 bp, *loxP* band is 327 bp). Lower panels: 3' gRNA region (WT band is 218 bp, *loxP* band is 258 bp). Note only embryo #3 was positive for both 5'– and 3'–*loxP*. (B) Long-range genotyping PCR results. WT band is 773 bp, floxed-allele band is 853 bp. Green arrow points to the region of WT and floxed-allele amplicons. Red arrows point to amplicons of null alleles. Note the weak band enclosed by the green box appeared slightly larger than WT. (C) Genotyping results of bacterial colonies from cloning of the purified long-range PCR products (green box in B) for embryo #3. (D) Summary of bacterial colony genotyping results.

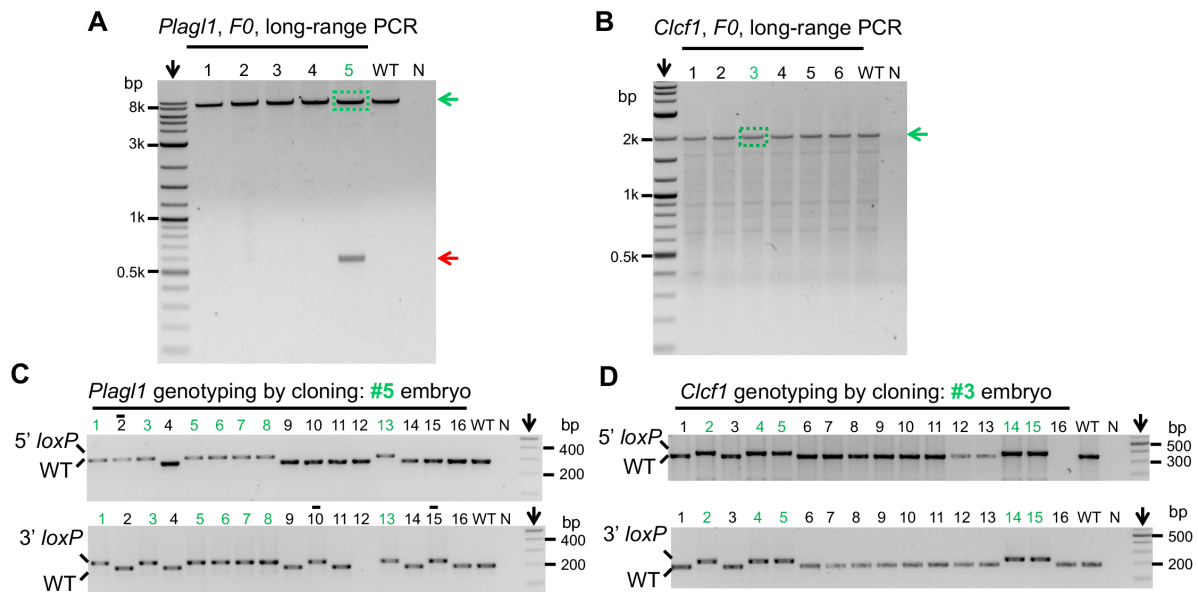

**Supplemental Fig. S10. Genotyping analyses of conditional alleles produced from C57BL/6J mice.**

(A) Long-range genotyping PCR results for *Plagl1* gene (WT band is 8,441 bp, floxed-allele band is 8,509 bp). Red arrow points to one null allele. (B) Long-range genotyping PCR results for *Clcf1* gene (WT band is 1,977 bp, floxed-allele band is 2,045 bp). (C,D) Genotyping results of bacterial colonies from cloning of the purified long-range PCR products enclosed by green boxes in A and B.

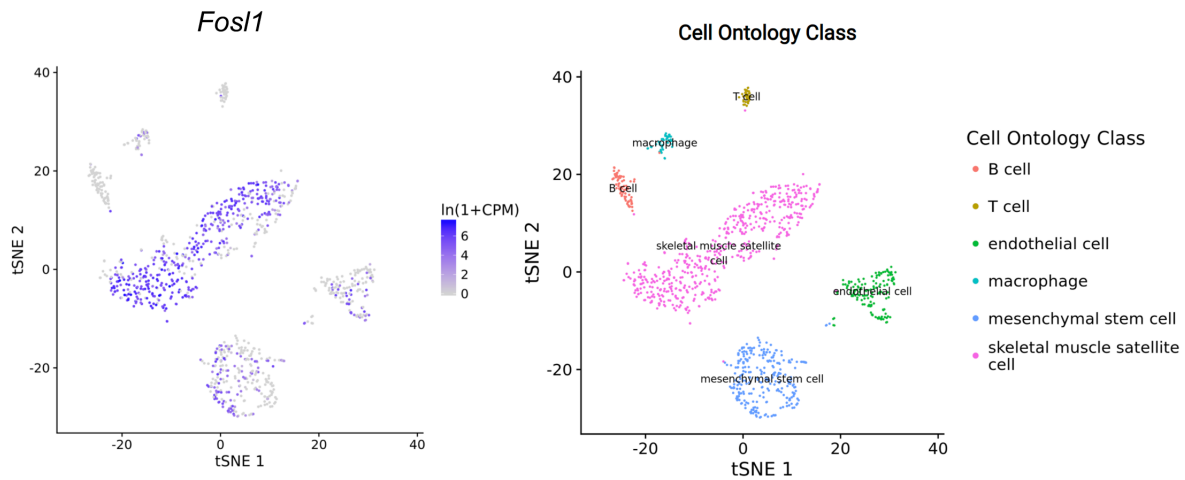

**Supplemental Fig. S11. Expression of *FosI1* gene in various cell types within mouse muscle tissue.**

*FosI1* expression data in single-cell RNA sequencing dataset of adult mouse muscles (Tabula Muris et al. 2018). Note that in addition to myoblasts (labelled as satellite cell), *FosI1* expression was also detected in fibroblasts (labelled as mesenchymal stem cell), endothelial cells and macrophages.
